# Supplementary material for: Automated CT Lung Density Analysis of Viral Pneumonia and Healthy Lungs Using Deep Learning-Based Segmentation, Histograms and HU Thresholds
Source: MDPI journal article supplement (doi:10.3390/diagnostics11050738), 2021-04-21
Supplement: s1 [file s1]

## Supplement

### Supplement 1: CT protocol, details

Mean peak tube voltage was 103.04 kVp (standard deviation [SD] 13.45), mean pitch factor 1.65 (SD 0.72), mean tube current-time product 292.79 mAs (SD 745.68 mAs). Mean computer tomography dose index was 4.15 mGy (SD 3.46 mGy), mean dose length product 161.48 mGy/cm (SD 159.61 mGy/cm). For CTPAs, an average of 72.2 ml (SD: 24.4) of contrast agent was applied (Iopamiro 370, Bracco Suisse SA; Ultravist 370, Bayer AG; or Xenetix 350, Guerbet AG).

### Supplement 2: Histogram analysis parameters, details

| Abbreviation  | Parameter                    | Description                                                                                                                                                                                                                |
|---------------|------------------------------|----------------------------------------------------------------------------------------------------------------------------------------------------------------------------------------------------------------------------|
| <b>STD</b>    | Histogram Standard Deviation | Standard deviation within the histogram, a measure of the spread of a distribution.                                                                                                                                        |
| <b>SKEW</b>   | Skewness                     | Skewness is a measure of asymmetry. A histogram that is shifted from a normal histogram shape to the right converges further to gaussian normal distribution which leads to a decrease of the skewness value towards zero. |
| <b>KURT</b>   | Kurtosis                     | Measure of peakness. For a histogram exceeding the gaussian normal distribution, kurtosis values rise, for a histogram flattening, kurtosis values diminish.                                                               |
| <b>MEAN</b>   | Mean Lung Attenuation        | Sum of the density of all voxels divided by the amount of voxels                                                                                                                                                           |
| <b>MEDIAN</b> | Median Lung Attenuation      | HU with 50% of the voxels being of higher HU and 50% being of lower HU                                                                                                                                                     |

### Supplement 3: Modified WHO Scale for Clinical Severity

Modified WHO Scale for Clinical Severity [44] in AP as used in this analysis. AP = atypical Pneumonia.

| Patient State                 | Descriptor                                                  | Score |
|-------------------------------|-------------------------------------------------------------|-------|
| outpatient                    | limitation of activity                                      | 1     |
| hospitalized - Mild disease   | hospitalized, no oxygen therapy                             | 2     |
|                               | oxygen by mask or nasal prongs                              | 3     |
| hospitalized - severe disease | non-invasive ventilation or high-flow oxygen                | 4     |
|                               | intubation and mechanical ventilation                       | 5     |
|                               | ventilation + additional organ support - pressor, RRT, ECMO | 6     |

## Supplement 4 R-squared of correlations of imaging biomarkers with clinical parameters

Coefficient of determination (r-squared) of correlations (lower triangle) and 95% confidence intervals (upper triangle, with lower confidence interval in first row and upper in second row, respectively) of imaging biomarkers with clinical parameters (CRP and clinical severity scale). The colormap applies to the Spearman rank correlation values and the range of confidence intervals. Abbreviations: NECT = non-enhanced computed tomography. STD = histogram standard deviation. SKEW = skewness. KURT = kurtosis. MEAN = mean lung attenuation. MEDIAN = median lung attenuation. HAA = high attenuation area. rHAA = relative high attenuation area.

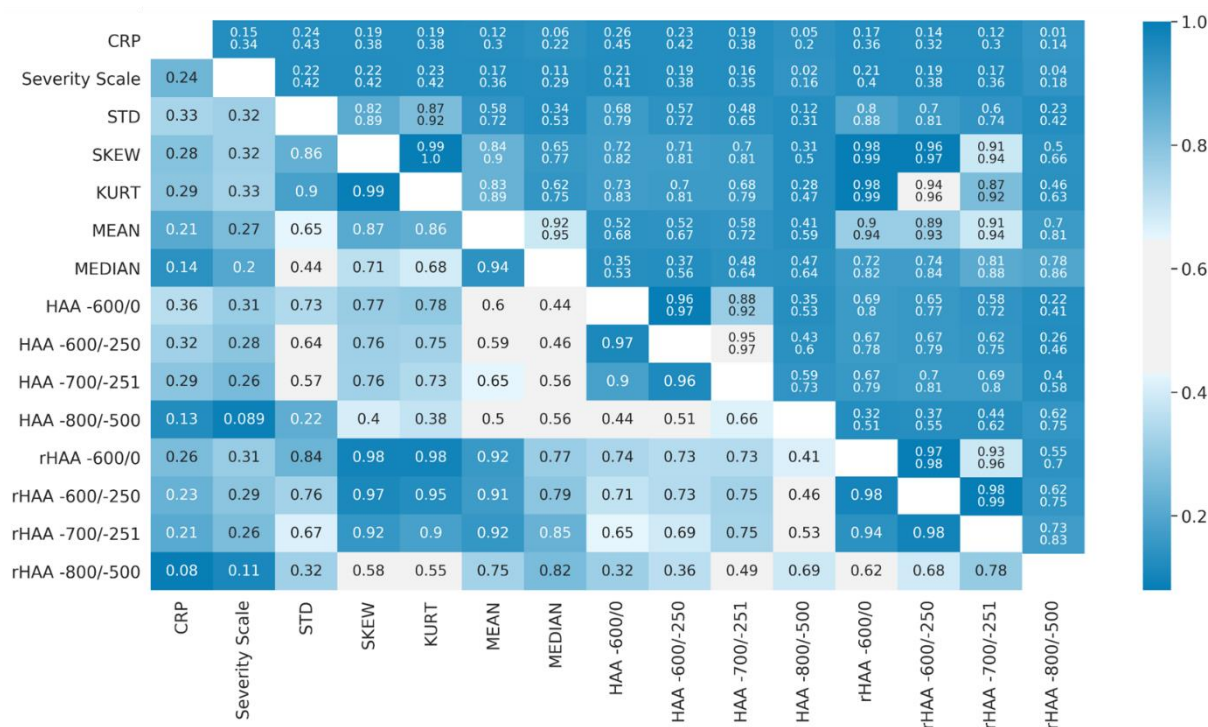

## Supplement 5: Direct access to image data

List of 20 chest CTs analysed during this study. The complete 1 mm series in soft-tissue kernel reconstruction are available online on the RapMed imaging platform.

To access the data, please go to: <https://www.rapmed.net/#/publications/NECT-CTPA>

Other CT dataset are available from the corresponding author on reasonable requests.

| Case ID | Group | RT-PCR result | Age | Sex |
|---------|-------|---------------|-----|-----|
| Case 1  | 0     | 0             | 33  | 2   |
| Case 2  | 0     | 0             | 49  | 2   |
| Case 3  | 0     | 0             | 25  | 1   |
| Case 4  | 0     | 0             | 69  | 1   |
| Case 5  | 0     | 0             | 72  | 2   |
| Case 6  | 0     | 0             | 37  | 2   |
| Case 7  | 0     | 0             | 82  | 1   |
| Case 8  | 0     | 0             | 22  | 2   |
| Case 9  | 0     | 0             | 52  | 1   |
| Case 10 | 0     | 0             | 59  | 2   |
| Case 11 | 1     | 1             | 46  | 1   |
| Case 12 | 1     | 1             | 42  | 2   |
| Case 13 | 1     | 1             | 56  | 2   |
| Case 14 | 1     | 2             | 51  | 1   |
| Case 15 | 1     | 2             | 65  | 2   |
| Case 16 | 1     | 1             | 36  | 2   |
| Case 17 | 1     | 2             | 75  | 1   |
| Case 18 | 1     | 2             | 64  | 1   |
| Case 19 | 1     | 2             | 52  | 1   |
| Case 20 | 1     | 2             | 54  | 2   |

**Group:** 0 = healthy lung group; 1 = Atypical pneumonia group;

**RT-PCR result:** 0 = negative; 1 = positive for Influenza; 2 = positive for SARS-CoV-2;

**Sex:** 1 = male; 2 = female;
